# Supplementary material for: Transposing an active fault database into a seismic hazard fault model for nuclear facilities – Part A: Building a database of potentially active faults (BDFA) for metropolitan France
Source: Copernicus journal article supplement (doi:10.5194/nhess-2017-96), 2017-03-14
Supplement: Supplementary file 1 [file Jomard_Annex_BDFA_TABLES.xlsx]

## Sheet: Main Table
	BDFA MAIN TABLE							Notes
	Name	Acronyme		Units	Type
	FAULT MAP						1	This table belongs the shapefile used to draw faults
	ID UNIQUE	UID	derived	-	text and number		2	It is the key of the relational model. Code is = IDF+TYP+SNB (formule is implemented in shapefile's table)
	Fault Name	FN	Implemented	-	text		3	The fault name was chosen as the one defined in national geological maps. If not mentionned the name is defined according the localities at the tips of the fault
	Segment NB	SNB	Implemented	-	number		4	Segment number is > 0
	Segment Name	SN	Implemented	-	number		5	Considers segments names coming from the littérature; or from regional toponyms
	ID Fault	IDF	Implemented	-	number		6	ID from geological map at 1/1 000 000 (BRGM, 2003). If not existing, an id is attributed starting from nb 10720
	Acronym	ACR	Implemented	-	text		7	Acronym of the fault
	Typology	TYP	Implemented	-	text		8	Fault segments typology. Indicate a complex segmentation with principal and secondary traces (4 classes are distinguished: M, major trace ; P, parallel trace ; OX orthogonal to major trace ; OB oblique to major trace)
	Eastern Tip	X1	Computed	km	number		9	Calculated from GIS files ; Coordinates are in the RGF_1993_Lambert_93 reference system Projection: Lambert_Conformal_Conic, GCS_RGF_1993, Datum: D_RGF_1993).
	Western tip	X2	Computed	km	number		10
	Northern tip	Y1	Computed	km	number		11
	Southern tip	Y2	Computed	km	number		12
	GEOMETRY						13	This table consider all geometric values of fault plane
	ID UNIQUE	UID	Implemented	-	text		14	key
	Trace	TRA	Implemented	-	predefined text		15	It certificates acquaintance’s degree of the surficial fault by 4 predefined terms: reliable, uncertain, hidden, suspect
	Azimut	AZ	Computed	arc degree (°)	number		16	This represents the intersection between fault plane and surface. Since 2013 it is computed via GIS. Degree CCW from north. Values admitted are from 1 up to 180 (0 =180). This value is then called azimut, not strike.
	Dip	DIP	Implemented	arc degree (°)	number		17	Numerical item which admits values from 0 to 90; text is banned and a convention is adopted: if literature reports vertical/subvertical fault planes without any value, a numerical item of c. 65 (°) is adopted.
	Dip's uncertainty	UDIP	Implemented	arc degree (°)	number		18	Numerical item which indicates variance from the dip’s value. For vertical/subvertical fault plans, the value of 65 is paired with (±) 15 (°)
	Trend	TDS	Implemented	cardinal points	predefined text		19	This value indicates the trend of the dip; I say the bearing of the line perpendicular to the strike. Eight values are eligible summarizing cardinal points abbreviations (N, NE, E, SE, S, SW, W, NW)
	Rake	RAKE	Implemented	arc degree (°)	number		20	Numerical item which indicates slip vector faulting over the fault plane. Values vary from -180 to +180 (this convention permit to state normal slip fault and reverse slip fault fot values <|90°|, and values >|90°|, respectively. Also called pitch
	Depth	DEPTH	Implemented	km	number		21	Numerical item indicating the depth of the fault
	Depth's uncertainty	UDEPTH	Implemented	km	number		22	Numerical item which indicates depth’s uncertainty in ± km
	Fault Segment Length	FSL	Computed	km	number		23	Surface Fault Length (computed via GIS)
	NEOTECTONIC						24	This table contains neotectonic observations
	ID UNIQUE	UID	Implemented	-	text		25	key
	Neotectonic Age	NA	Implemented	-	predefined text		26	Age of the last known movement on the fault (4 predefined terms: Quaternary, Pliocene, Miocene, and Undetermined)
	Neotectonic Observations	NOBS	Implemented	-	text		27	Nature of faulted or deformed markers - description in French
	Tectonic Geomorphology	TG	Implemented	-	text		28	Morphological signature of the fault (In french)
	QUANTITATIVE NEOTECTONIC (AGE)						29	This table supplies ages of deformed units
	ID UNIQUE	UID	Implemented	-	text		30	key
	Deformed Chronostratigraphic Units	DCHR	Implemented	-	text		31	Local term indicating the most recent chronostratigraphic units involved by fault
	Age DCHR Top	DCHRT	Implemented	yr	number		32	Numerical value which gives the upper limit (geochronological) of the unit involved in the deformation
	North Western European Units	NWEU	Implemented	-	text		33	Term indicating the most recent North West European chronostratigraphic units which is involved by fault. If for example in literature is reported Würm, it will report Weichselian.
	Undeformed Chronostratigraphic Units	UCHR	Implemented	-	text		34	Local term indicating the most recent chronostratigraphic units not involved by fault
	Age DCHR Base	DCHRB	Implemented	yr	number		35	Numerical value which gives the lower limit (geochronological) of the younger unit involved in the deformation. If dating doesn’t exist, it could be esteemed through chronostratigraphic correspondent
	Dating method	DM	Implemented	-	text		36	Dating method used to establish DCHRT and DCHRB; 3 predefined terms: radiometric, relative (stratigraphic principles, biostratigraphy), indirect (facies)
	Offset span time	OST	Implemented	yr	number		37	Span representing the value used for calculate slip (rate)
	Age used for rate	AR	Implemented	-	text		38	Chronostratigraphy Units (Systems, Series, Stage, etc.) restraining OST
	QUANTITATIVE NEOTECTONIC (KINEMATICS)						39	This table supplies kinematic information
	ID UNIQUE	UID	Implemented	-	text		40	key
	Vertical kinematics	VK	Implemented	-	predefined text		41	Vertical movements: 4 predefined terms (vertical, reverse, normal, or undefined)
	Horizontal kinematics	HK	Implemented	-	predefined text		42	Horizontal movements: 4 predefined terms (horizontal, dextral, sinistral, or undefined)
	Former fault kinematics	FFK	Implemented	-	predefined text		43	Pre-Neogen fault's movement; 10 predefined terms (reverse, normal, horizontal, vertical, dextral, sinistral, transpressive, transtensive, polyphases, undefined)
	Neotectonic Offset	NEOF	Implemented	m	number		44	Minimal and maximal values used to esteem neotectonic offset
	Total offset	TOOF	Implemented	m	number		45	Post-Mesozoic Offset (cumulated)
	Vertical slip rate	VSR	Implemented	mm/yr	number		46	Vertical component of the fault slip rate
	Horizontal slip rate	HSR	Implemented	mm/yr	number		47	Horizontal component of the fault slip rate
	Regional uplift rate	RUR	Implemented	mm/yr	number		48	Regional uplift: it doesn’t distinguish between topographic or rock uplift
	GPS displacement rates	GPSDR	Implemented	mm/yr	number		49	Displacement rates inferred from GPS measurements
	Geodetical displacement rates	GDR	Implemented	mm/yr	number		50	Displacement rates inferred from geodetical measurements
	Comments	CQNT	Implemented	-	text		51	Supply additional information as how data has been reported (e.g. brackets including min and max values, averaged value, etc.)
	INDEX APPRAISAL						52	This table supplies index to qualitatively evaluation of faulting
	ID UNIQUE	UID	Filled	-	text		53	key
	Age index	IAN	Implemented	-	predefined values		54	It values the age of the last deformation associated with faulting: 3, 2, 1, and 0 are the standards permitted. They correspond to Quaternary, Pliocene, Miocene, and Undetermined age reported in NA field
	Trace Index	TI	Implemented	-	predefined values		55	It values the acquaintance’s degree of the fault trace through 2 values: if any description and features exist, the trace is associated to 0. Trace observed, mapped or indirectly established (geophysical) returns the value of 1, instead. Cf. TRA field
	GDR index	IGDR	Implemented	-	predefined values		56	It questions if a geodetical measurement is (positively) related to a fault segment. Two standards are permitted: 1 and 0 if relationship is founded or not, respectively (cf. GDR field)
	Historical seismicity	HIST	Implemented	-	predefined values		57	It questions if historical seismicity could be associated with segment fault trace. Two values are permitted: 1 indicates epicenter(s) and segment are proximal (located less than 5 km); 0, any link appears as eligible, instead
	Instrumental seismicity	INST	Implemented	-	predefined values		58	It questions if instrumental seismicity could be associated with segment fault trace. Two values are permitted: 1 indicates epicenter(s) and segment are proximal (located less than 5 km); 0, any link appears as eligible, instead
	Geomorphological Index	GI	Implemented	-	predefined values		59	Relate geomorphological features and landscape over different scales (fault scarp, hydrological pattern, etc.). Two values are permitted: 1 and 0 indicates that correspondence between geomorphological signature and neotectonic is eligible or not, respectively
	Robustness index	IR	Computed	-	values		60	It attempts to standardize fault’s activity following an empirical expression modified from Baize et al.(2013): IR = (TI + 0.1) • (S + IAN + GI + 3HS + 4IS + 2IGPS)
	EDITING NOTES						61	This table reports traceability of implementation
	ID UNIQUE	UID	Filled	-	text		62	key
	Compiler	C	Implemented	first name, second name	text		63	Person who compiled data and arranged reports/list
	Internal reviewers	IRW	Implemented	first name, second name	predefined text		64	Person (s) internal at the IRSN/BERSSIN who reviewed the work
	External reviewers	ERW	Implemented	first name, second name	text		65	Person (s) external at the IRSN/BERSSIN who reviewed the work
	Release date	YR	Implemented	yyyy	number		66	Achievement’s year
	Last Update	LUP	Implemented	mm_yyyy	number		67	Last updating

## Sheet: INDEX_REF
	BDFA INDEX REF							Notes
	Name	Acronyme		Units	Type
	INDEX_REF						1	This table arranges the cited references
	ID FAULT	IDF	Implemented	-	number		2	It is the key of the relational model
	ID Reference	IDR	Implemented	-	code		3	Short name of the reference
	Bibliographic reference	BR	Implemented	-	text		4	Reporting literature with standard “Name, year” of the publication
	Topic(s)	TP	Implemented	-	Sequence of letters		5	A sequence of letters indicating topic and/or discussions of the paper; from French words, these letters are: G (geometry of fault trace), M (geomorphology), N (name of the fault), A (ages), C (kinematics), NEOT (neotectonic/tectonic geomorphology), TX (slip rate /uplift rate), S (seismicity), T (fault trace), SHF (historic earthquake and faulting), Q (quaternary features), R (slip), GPH (geophys…
	Impact	IPT	Implemented	-	text		6	It marks how paper underpins BDFA’s issues; 4 values are eligible: A > B > C > D

## Sheet: REFERENCES
	BDFA REFERENCES							Notes
	Name	Acronyme		Units	Type
	REFERENCES						1	This table arranges the cited references
	ID Reference	IDR	Implemented	-	code		2	Short name of the reference; it is the key which relate this table with "index_ref" table
	paper	PAP	Implemented	-	text		3	It gives the complete reference following this standard: Family Name, First Name (year), title, journal, volume, pages, doi
	link to paper	PAPL	Implemented	-	text		4	Link the paper to IRSN intranet location

## Sheet: INDEX_EVIDENCES
	BDFA INDEX EVIDENCES							Notes
	Name	Acronyme		Units	Type
	INDEX_CLUES						1	This table serves to relate BDFA with both NEOPAL and IRSN indices of fault activity
	ID Fault	IDF	Implemented	-	number		2	Here it works as key
	NEOPAL ID	NPL	Implemented	-	number		3	It reports the ID used in the NEOPAL index database
	IRSN ID	IRSN	Implemented	-	number		4	It reports the ID used in the IRSN index database

## Sheet: Index_seismic
	BDFA INDEX SEISMIC							Notes
	Name	Acronyme		Units	Type
	INDEX_SEISMIC						1	This table serves to relate BDFA with instrumental and historical catalogues
	ID UNIQUE	UID	Derived	-	text and number		2	It is the key of the relational model.
	ID FPEC	NumEvt	Implemented	-	number		3	It reports the NumEvt of the historical record founded in the FPEC catalogue
	ID LDG	ID_ldg	Implemented	-	number		4	It reports the ID of the instrumental record founded in the LDG catalogue (FIDLDG)
	This table replaces the incomplete table called INDEX_SEISMES_SISFRANCE; more reasons:
	1) It may relate both historical and instrumental earthquake
	2) Some items (e.g. certitude de position) must be in the original table.
